# Supplementary material for: Atypical IκB Bcl3 enhances the generation of the NF-κB p52 homodimer
Source: PubMed Central journal article supplement (PMC9389042; doi:10.3389/fcell.2022.930619), 2022-08-05
Supplement: Presentation1.pdf [file Presentation1.pdf]

## Supplementary Information

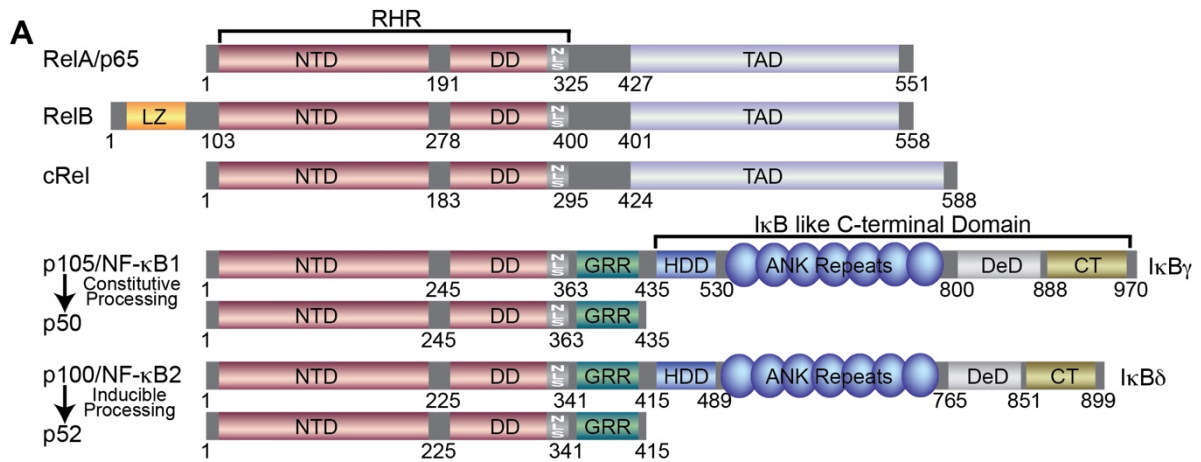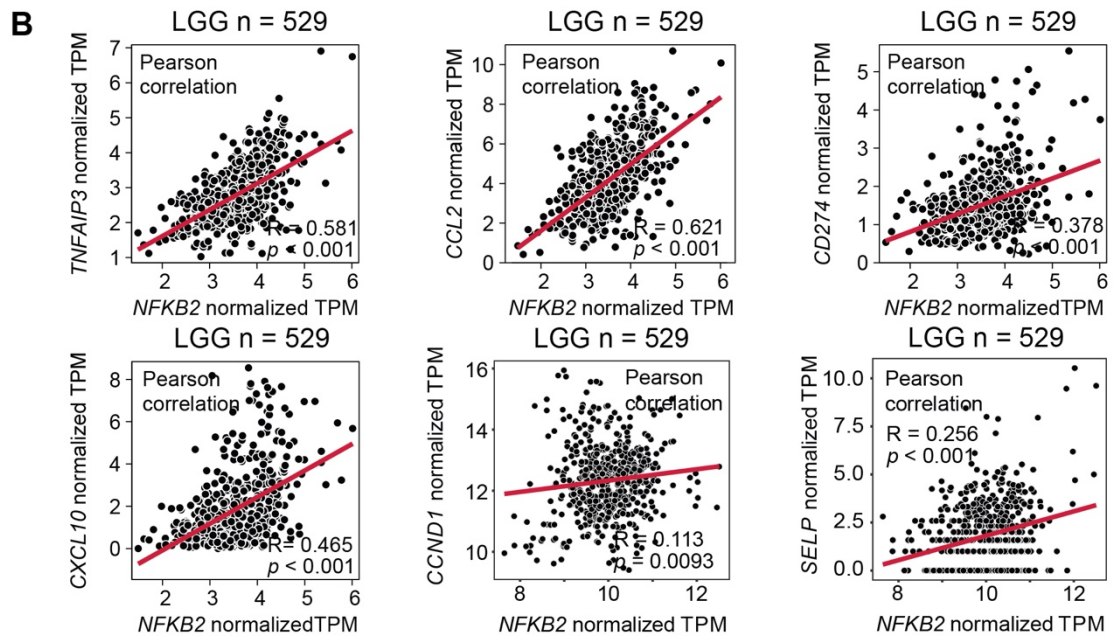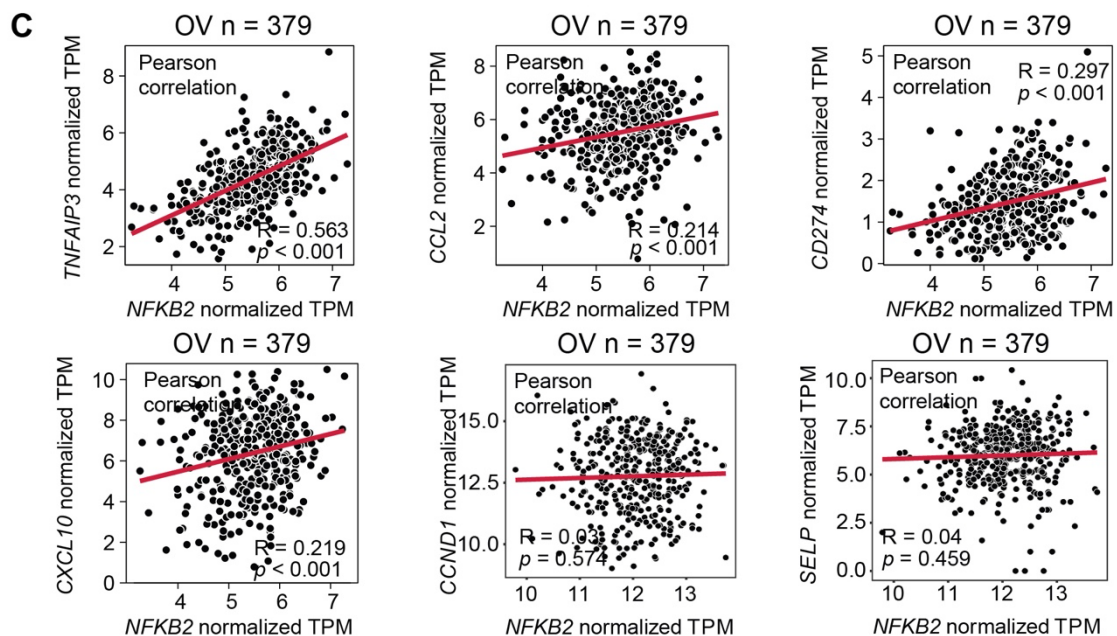

**Figure S1. Correlation analysis of *NFKB2*, related to Figure 1.**

(A) Domain organization of NF- $\kappa$ B subunits. The NF- $\kappa$ B family is characterized by having the rel homology region (RHR). The RHR is folded into two distinct domains, N-terminal Domain (NTD) and dimerization domain (DD). All NF- $\kappa$ B proteins contains a nuclear localization signal (NLS). RelA, RelB and cRel subunits (Class II) contain a transcriptional activation domain (TAD). RelB also has an N-terminal leucine zipper (LZ) domain. The p50 and p52 subunits (Class I) are generated from their precursor proteins NF- $\kappa$ B1/p105 and NF- $\kappa$ B2/p100, respectively. The precursor proteins contain an Ankyrin (ANK) repeat domain in their C-termini, function as inhibitor of NF- $\kappa$ B. The precursors also contain a glycine rich region (GRR), a helical dimerization domain (HDD), a death domain (DeD) and a C-terminal domain (CT).

(B-C) Scatter plots showing the correlation between mRNA expression of *NFKB2* and target genes (*TNFAIP3*, *CCL2*, *CD274*, *CXCL10*, *CCND1* and *SELP*) in (C) brain lower grade glioma (LGG) and (D) ovarian serous cystadenocarcinoma (OV) from TCGA database. “n” denotes the sample number.

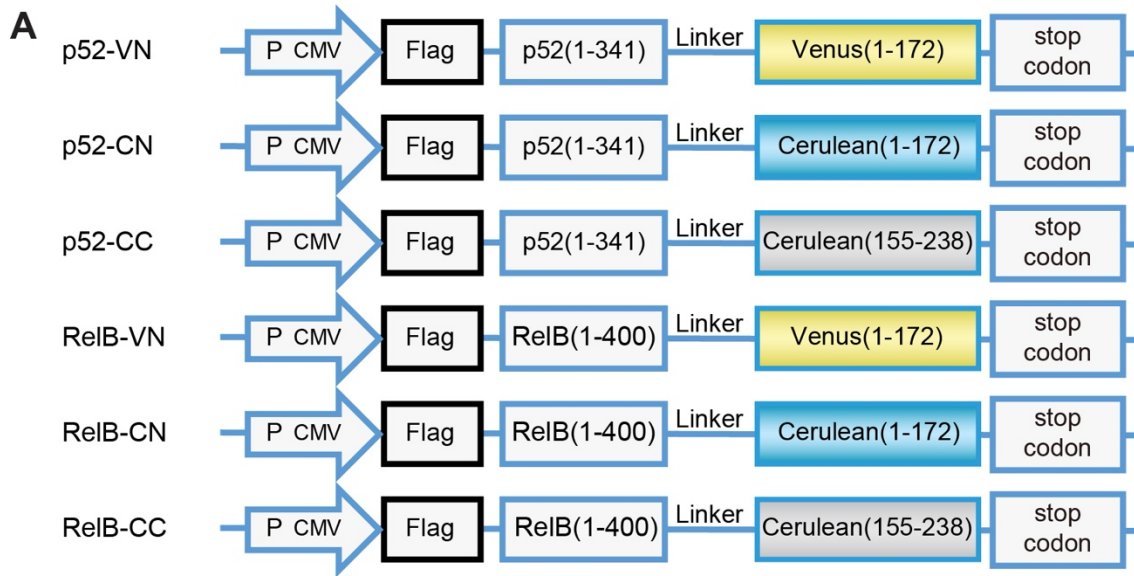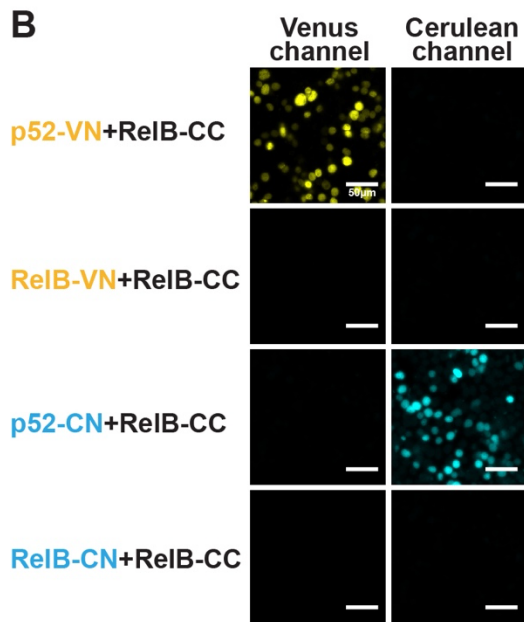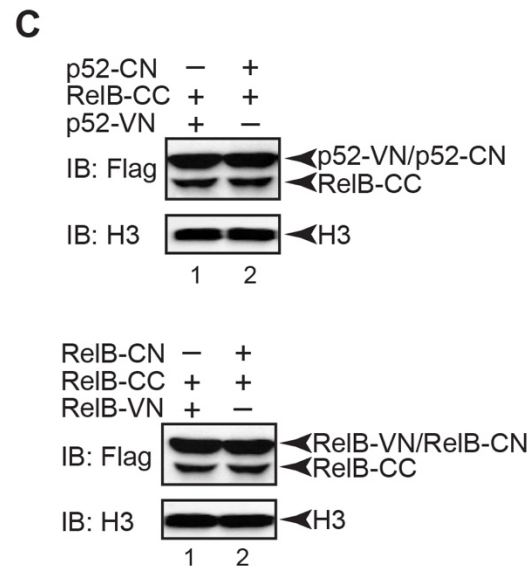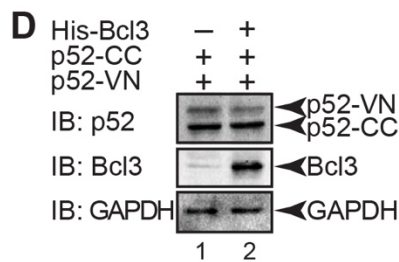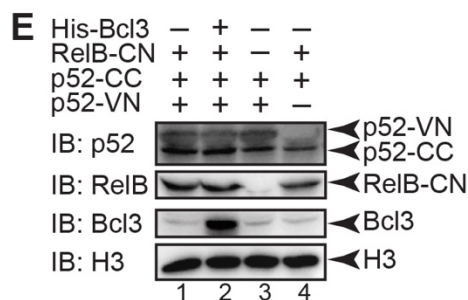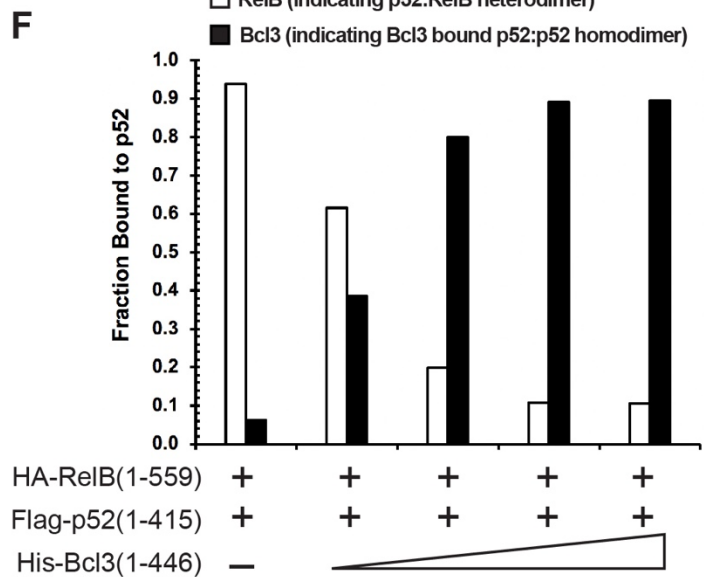

**Figure S2. Construction of NF- $\kappa$ B multicolor BiFC system, related to Figure 2.**

- (A) Diagrams showing the p52-VN, -CN, -CC; and RelB-VN, -CN and -CC BiFC constructs.
- (B) Fluorescent images with the co-expression of indicated plasmids. p52-VN+RelB-CC brings VN and CN together to form a fluorescent protein which could be detected at Venus channel; and p52-CN+RelB-CC brings CC and CN together to form an intact Cerulean protein, both fluorescent signals indicating the p52:RelB heterodimer formation in cells. However, neither RelB-VN+RelB-CC nor RelB-CN+RelB-CC generated any fluorescent signals since RelB does not form homodimer in cells.
- (C) Expression of p52-VN, p52-CN, RelB-CC, RelB-VN and RelB-CN in HEK 293T cells detected by immunoblot.
- (D) Expression of p52-VN and p52-CC in HEK 293T cells with and without Bcl3 detected by immunoblot.
- (E) Expression of p52-VN, p52-CC and RelB-CN in HEK 293T cells with and without Bcl3 detected by immunoblot.
- (F) Quantification of western blot band intensities in Figure 2F. ImageJ was used to measure the band intensity; fraction bound to p52 was calculated by the band intensity of RelB or Bcl3 divided by the total band intensities of RelB and Bcl3.

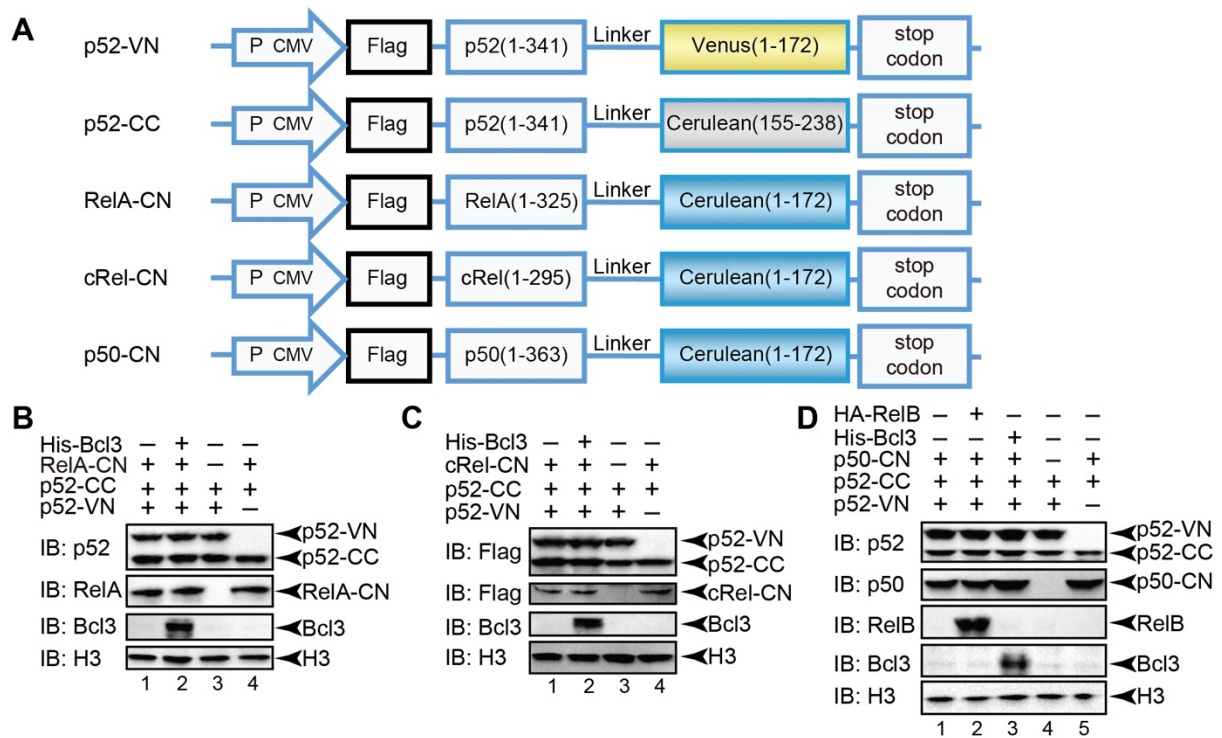

**Figure S3. Expression of p52, RelA, cRel and p50 BiFC constructs, related to Figure 3.** (A) Diagrams showing the p52-VN, p52-CC, RelA-CN, cRel-CN and p50-CN BiFC constructs. (B-D) Expressions of His-Bcl3, p52-VN, p52-CC and (B) RelA-CN, (C) cRel-CN, and (D) p50-CN and HA-RelB in HEK 293T cells detected by immunoblot.

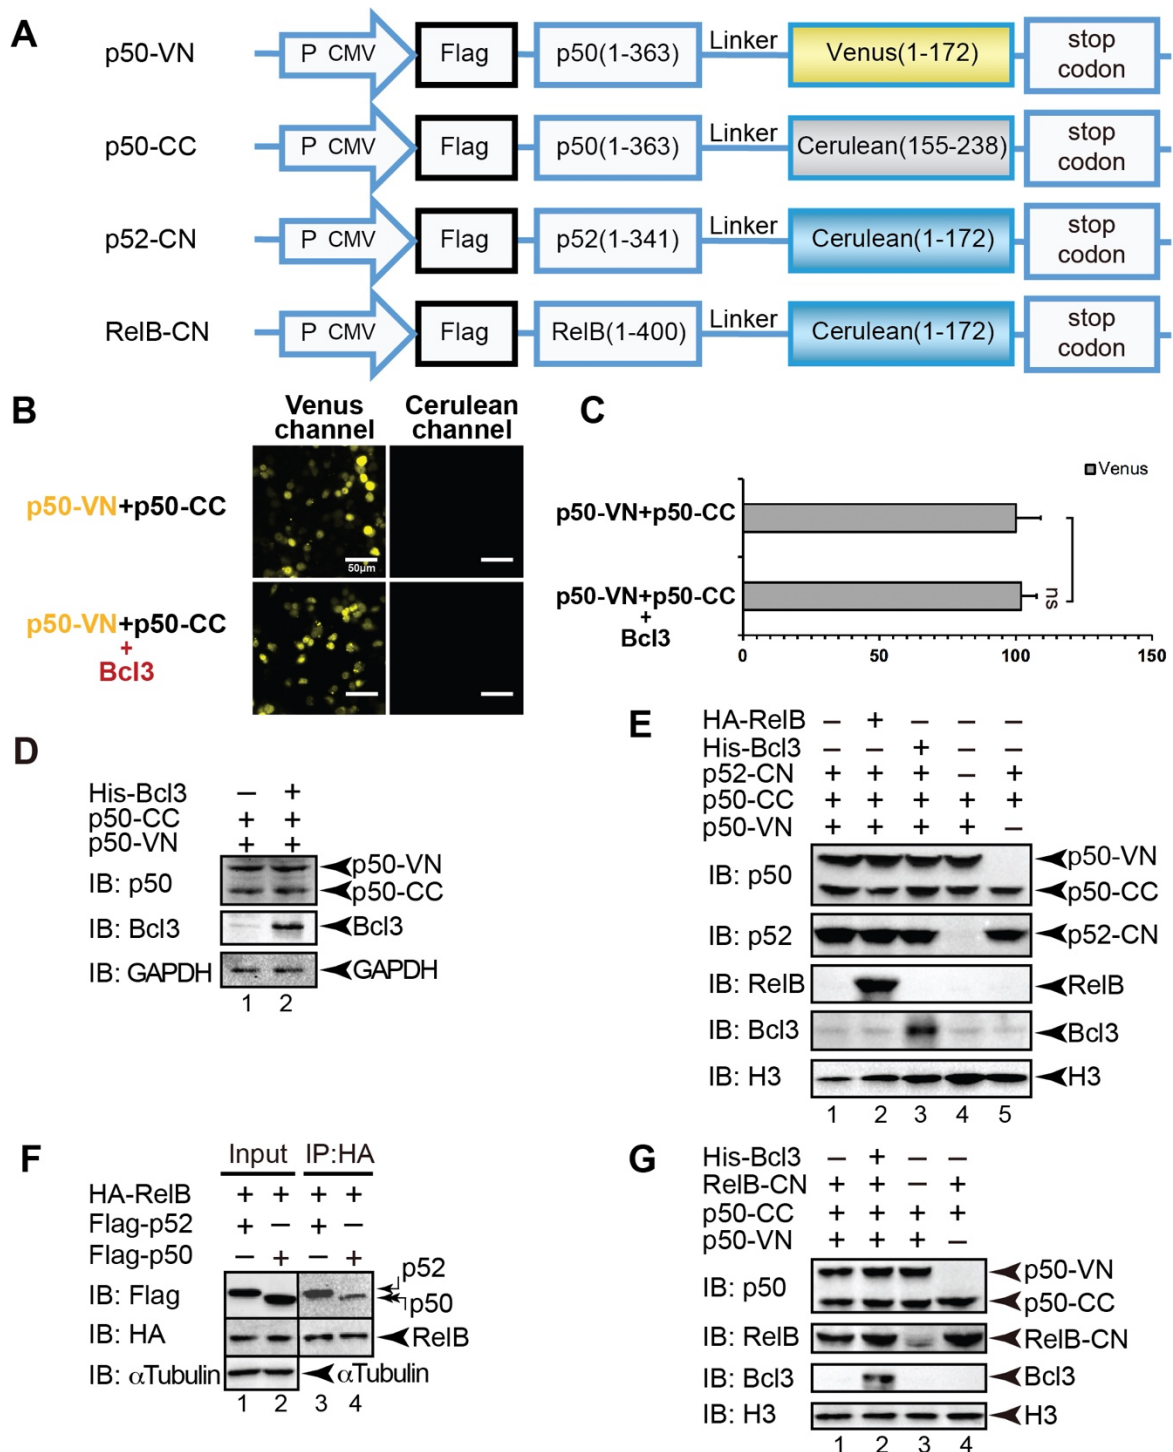

**Figure S4. p50 and p52 or RelB multicolor BiFC system, related to Figure 4.**

(A) Diagrams showing the p50-VN, p50-CC, p52-CN and RelB-CN BiFC constructs.

(B) Fluorescent images with the co-expression of indicated plasmids. The addition of Bcl3 did not further enhance the fluorescent intensity of p50-VN and p50-CC.

(C) Quantification of fluorescent intensity in (B); the data were analyzed from images of three independent experiments. n.s., not significant versus no Bcl3 co-expression (t test). Error bars represent SD.

(D) Expression of p52-VN and p52-CC in HEK 293T cells with and without His-Bcl3 detected by immunoblot.

(E) Expression of p50-VN, p50-CC and p52-CN in HEK 293T cells with and without HA-ReIB or His-Bcl3 detected by immunoblot.

(F) Co-IP showing HA-ReI $\beta$  interacted with more Flag-p52 than Flag-p50.

(G) Expression of p50-VN, p50-CC and ReI $\beta$ -CN in HEK 293T cells with and without His-Bcl3 detected by immunoblot.



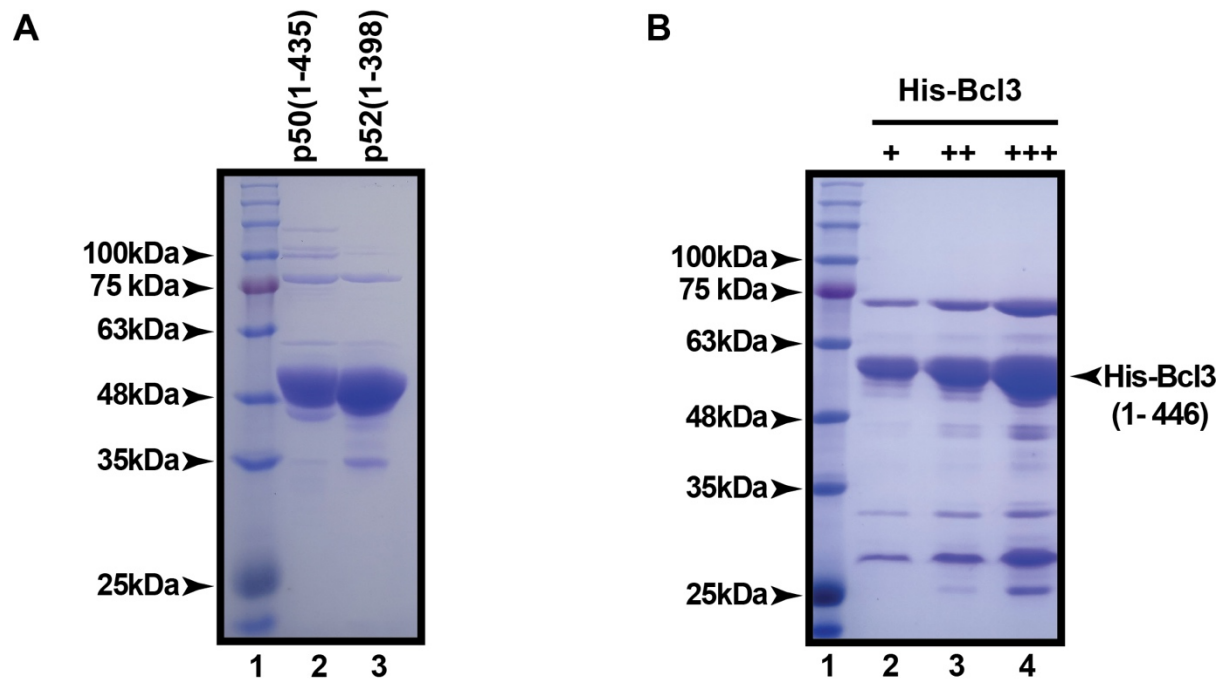

**Figure S5. Recombinant Bcl3, p52 and p50 proteins, related to Figure 5.**  
 (A-B) SDS-PAGE analysis showing the purity of (A) the non-tagged p52 and p50 proteins;  
 (B) His-tagged Bcl3.



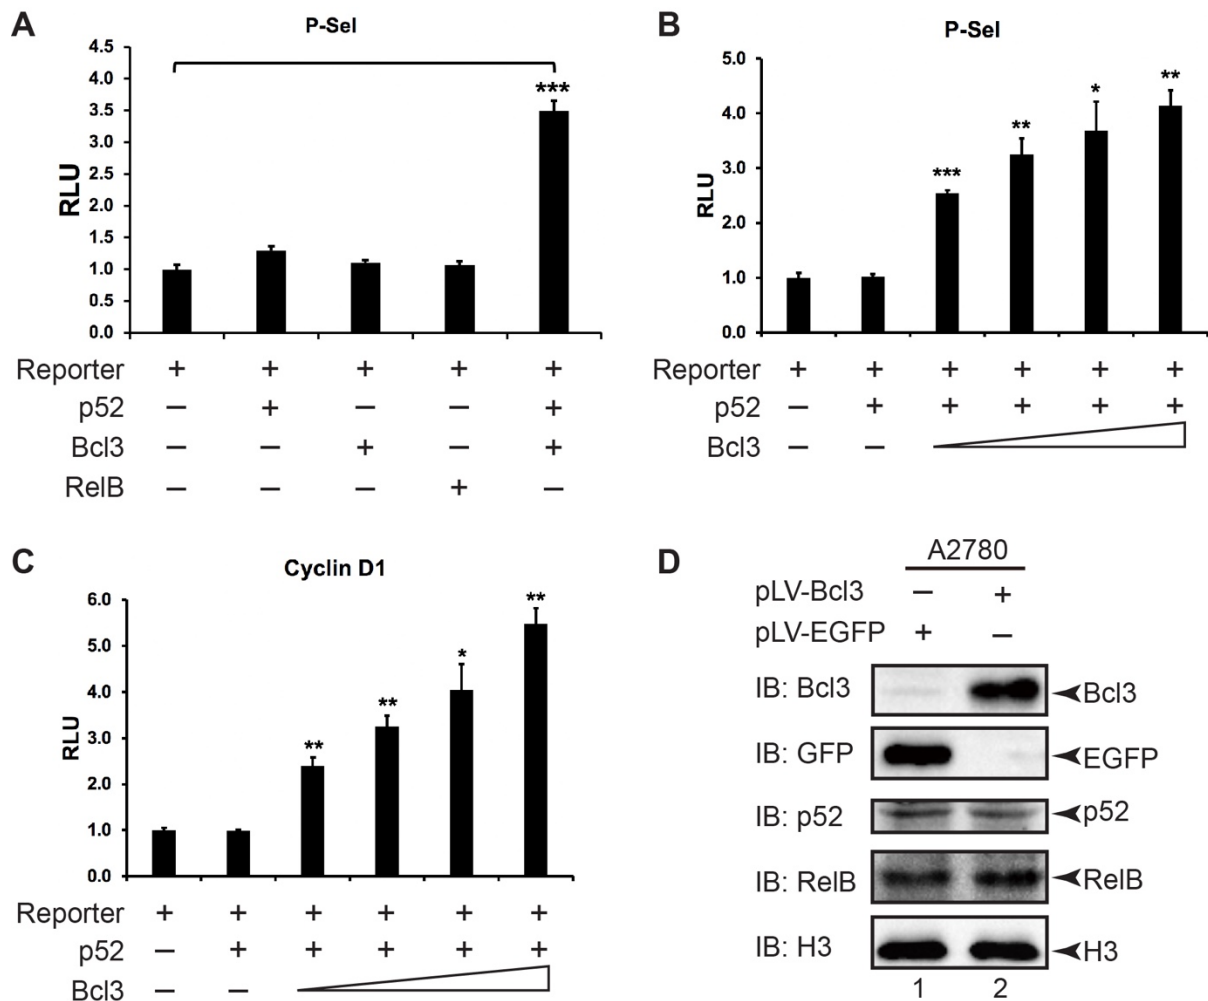

**Figure S6. Bcl3 increases the expression of p52:p52 homodimer target genes, related to Figure 6.**

(A) Expression of either p52, RelB or Bcl3 alone does not activate the P-Selectin luciferase reporter; co-expression of p52 and Bcl3 activates the reporter.

(B-C) P-Selectin in (B) and Cyclin D1 in (C) luciferase reporter activities were increased with increasing Bcl3 co-expression. Reporter plasmid encoding P-Selectin or Cyclin D1  $\kappa$ B site were co-transfected with a constant amount of p52 and an increasing amount of Bcl3 into HeLa cells. The data were analyzed from three independent experiments performed in triplicate. RLU, relative luciferase unit. \* $p < 0.05$ ; \*\* $p < 0.01$ ; \*\*\* $p < 0.001$  versus reporter only control (t test). Error bars represent standard deviation (SD).

(D) Western blot analysis showing the overexpression of Bcl3 in A2780 cells by lentivirus transduction. pLV-EGFP was used as infection control. Bcl3 overexpression does not affect the endogenous level of p52 and RelB.
